# Supplementary material for: The Complete Chloroplast Genome of a Key Ancestor of Modern Roses, Rosa chinensis var. spontanea, and a Comparison with Congeneric Species
Source: PubMed Central journal article supplement (PMC6017658; doi:10.3390/molecules23020389), 2018-02-12
Supplement: molecules-23-00389-s001.pdf [file molecules-23-00389-s001.pdf]

Table S1 Genes encoded in the chloroplast genome of *Rosa chinensis* var. *spontanea*

| Gene            | Minimum | Maximum | Length(bp) | Direction | Exon I<br>(bp) | Intron I<br>(bp) | Exon II<br>(bp) | Intron II<br>(bp) | Exon III<br>(bp) |
|-----------------|---------|---------|------------|-----------|----------------|------------------|-----------------|-------------------|------------------|
| <i>trnH-GUG</i> | 89      | 162     | 74         | reverse   |                |                  |                 |                   |                  |
| <i>psbA</i>     | 450     | 1,511   | 1,062      | reverse   |                |                  |                 |                   |                  |
| <i>trnK-UUU</i> | 1,776   | 4,345   | 2,570      | reverse   | 35             | 2,498            | 37              |                   |                  |
| <i>matK</i>     | 2,069   | 3,580   | 1,512      | reverse   |                |                  |                 |                   |                  |
| <i>rps16</i>    | 5,149   | 6,292   | 1,144      | reverse   | 228            | 874              | 42              |                   |                  |
| <i>trnQ-UUG</i> | 7,143   | 7,214   | 72         | reverse   |                |                  |                 |                   |                  |
| <i>psbK</i>     | 7,634   | 7,819   | 186        | forward   |                |                  |                 |                   |                  |
| <i>psbI</i>     | 8,058   | 8,168   | 111        | forward   |                |                  |                 |                   |                  |
| <i>trnS-GCU</i> | 8,333   | 8,420   | 88         | reverse   |                |                  |                 |                   |                  |
| <i>trnG-GCC</i> | 9,066   | 9,831   | 766        | forward   | 23             | 695              | 48              |                   |                  |
| <i>trnR-UCU</i> | 10,011  | 10,082  | 72         | forward   |                |                  |                 |                   |                  |
| <i>atpA</i>     | 10,624  | 12,147  | 1,524      | reverse   |                |                  |                 |                   |                  |
| <i>atpF</i>     | 12,200  | 12,754  | 555        | reverse   |                |                  |                 |                   |                  |
| <i>atpH</i>     | 13,242  | 13,487  | 246        | reverse   |                |                  |                 |                   |                  |
| <i>atpI</i>     | 14,420  | 15,163  | 744        | reverse   |                |                  |                 |                   |                  |
| <i>rps2</i>     | 15,389  | 16,099  | 711        | reverse   |                |                  |                 |                   |                  |
| <i>rpoC2</i>    | 16,340  | 20,494  | 4,155      | reverse   |                |                  |                 |                   |                  |
| <i>rpoC1</i>    | 20,672  | 23,481  | 2,810      | reverse   | 1,611          | 764              | 435             |                   |                  |
| <i>rpoB</i>     | 23,513  | 26,725  | 3,213      | reverse   |                |                  |                 |                   |                  |
| <i>trnC-GCA</i> | 27,944  | 28,014  | 71         | forward   |                |                  |                 |                   |                  |
| <i>petN</i>     | 28,791  | 28,880  | 90         | forward   |                |                  |                 |                   |                  |
| <i>psbM</i>     | 30,158  | 30,262  | 105        | reverse   |                |                  |                 |                   |                  |
| <i>trnD-GUC</i> | 30,785  | 30,858  | 74         | reverse   |                |                  |                 |                   |                  |
| <i>trnY-GUA</i> | 31,279  | 31,362  | 84         | reverse   |                |                  |                 |                   |                  |
| <i>trnE-UUC</i> | 31,422  | 31,494  | 73         | reverse   |                |                  |                 |                   |                  |
| <i>trnT-GGU</i> | 32,010  | 32,081  | 72         | forward   |                |                  |                 |                   |                  |
| <i>psbD</i>     | 33,410  | 34,471  | 1,062      | forward   |                |                  |                 |                   |                  |
| <i>psbC</i>     | 34,419  | 35,840  | 1,422      | forward   |                |                  |                 |                   |                  |
| <i>trnS-UGA</i> | 36,081  | 36,173  | 93         | reverse   |                |                  |                 |                   |                  |
| <i>psbZ</i>     | 36,555  | 36,743  | 189        | forward   |                |                  |                 |                   |                  |
| <i>trnG-UCC</i> | 37,093  | 37,163  | 71         | forward   |                |                  |                 |                   |                  |
| <i>trnM-CAU</i> | 37,364  | 37,437  | 74         | reverse   |                |                  |                 |                   |                  |
| <i>rps14</i>    | 37,600  | 37,902  | 303        | reverse   |                |                  |                 |                   |                  |
| <i>psaB</i>     | 38,029  | 40,233  | 2,205      | reverse   |                |                  |                 |                   |                  |
| <i>psaA</i>     | 40,259  | 42,511  | 2,253      | reverse   |                |                  |                 |                   |                  |
| <i>ycf3</i>     | 43,222  | 45,235  | 2,014      | reverse   | 153            | 766              | 228             | 741               | 126              |
| <i>trnS-GGA</i> | 46,113  | 46,199  | 87         | forward   |                |                  |                 |                   |                  |
| <i>rps4</i>     | 46,492  | 47,097  | 606        | reverse   |                |                  |                 |                   |                  |
| <i>trnT-UGU</i> | 47,496  | 47,568  | 73         | reverse   |                |                  |                 |                   |                  |
| <i>trnL-UAA</i> | 48,749  | 49,379  | 631        | forward   | 37             | 544              | 50              |                   |                  |
| <i>trnF-GAA</i> | 49,785  | 49,857  | 73         | forward   |                |                  |                 |                   |                  |
| <i>ndhJ</i>     | 50,588  | 51,064  | 477        | reverse   |                |                  |                 |                   |                  |
| <i>ndhK</i>     | 51,187  | 51,867  | 681        | reverse   |                |                  |                 |                   |                  |
| <i>ndhC</i>     | 51,911  | 52,273  | 363        | reverse   |                |                  |                 |                   |                  |
| <i>trnV-UAC</i> | 52,876  | 53,547  | 672        | reverse   | 37             | 596              | 39              |                   |                  |
| <i>trnM-CAU</i> | 53,715  | 53,787  | 73         | forward   |                |                  |                 |                   |                  |
| <i>atpE</i>     | 53,964  | 54,365  | 402        | reverse   |                |                  |                 |                   |                  |
| <i>atpB</i>     | 54,388  | 55,866  | 1,479      | reverse   |                |                  |                 |                   |                  |
| <i>rbcL</i>     | 56,649  | 58,076  | 1,428      | forward   |                |                  |                 |                   |                  |
| <i>accD</i>     | 58,740  | 60,203  | 1,464      | forward   |                |                  |                 |                   |                  |

|                 |         |         |       |         |     |     |     |     |     |
|-----------------|---------|---------|-------|---------|-----|-----|-----|-----|-----|
| <i>psaI</i>     | 60,671  | 60,784  | 114   | forward |     |     |     |     |     |
| <i>ycf4</i>     | 61,208  | 61,762  | 555   | forward |     |     |     |     |     |
| <i>cemA</i>     | 62,213  | 62,902  | 690   | forward |     |     |     |     |     |
| <i>petA</i>     | 63,111  | 64,073  | 963   | forward |     |     |     |     |     |
| <i>psbJ</i>     | 65,041  | 65,163  | 123   | reverse |     |     |     |     |     |
| <i>psbL</i>     | 65,300  | 65,416  | 117   | reverse |     |     |     |     |     |
| <i>psbF</i>     | 65,439  | 65,558  | 120   | reverse |     |     |     |     |     |
| <i>psbE</i>     | 65,568  | 65,819  | 252   | reverse |     |     |     |     |     |
| <i>petL</i>     | 67,079  | 67,174  | 96    | forward |     |     |     |     |     |
| <i>petG</i>     | 67,350  | 67,463  | 114   | forward |     |     |     |     |     |
| <i>trnW-CCA</i> | 67,588  | 67,661  | 74    | reverse |     |     |     |     |     |
| <i>trnP-UGG</i> | 67,806  | 67,879  | 74    | reverse |     |     |     |     |     |
| <i>psaJ</i>     | 68,317  | 68,451  | 135   | forward |     |     |     |     |     |
| <i>rpl33</i>    | 68,911  | 69,111  | 201   | forward |     |     |     |     |     |
| <i>rps18</i>    | 69,324  | 69,629  | 306   | forward |     |     |     |     |     |
| <i>rpl20</i>    | 69,923  | 70,276  | 354   | reverse |     |     |     |     |     |
| <i>rps12*</i>   | 71,057  | 143,071 | 908   | mixed   | 114 |     | 232 | 536 | 26  |
| <i>rps12*</i>   | 71,057  | 100,223 | 908   | reverse | 26  | 537 | 232 |     | 114 |
| <i>clpP</i>     | 71,372  | 73,447  | 2,076 | reverse |     |     |     |     |     |
| <i>psbB</i>     | 73,899  | 75,425  | 1,527 | forward |     |     |     |     |     |
| <i>psbT</i>     | 75,611  | 75,712  | 102   | forward |     |     |     |     |     |
| <i>psbN</i>     | 75,787  | 75,918  | 132   | reverse |     |     |     |     |     |
| <i>psbH</i>     | 76,037  | 76,261  | 225   | forward |     |     |     |     |     |
| <i>petB</i>     | 76,384  | 77,819  | 1,436 | forward | 6   | 788 | 642 |     |     |
| <i>petD</i>     | 78,013  | 79,215  | 1,203 | forward |     |     |     |     |     |
| <i>rpoA</i>     | 79,416  | 80,411  | 996   | reverse |     |     |     |     |     |
| <i>rps11</i>    | 80,471  | 80,887  | 417   | reverse |     |     |     |     |     |
| <i>rpl36</i>    | 81,046  | 81,159  | 114   | reverse |     |     |     |     |     |
| <i>rps8</i>     | 81,640  | 82,044  | 405   | reverse |     |     |     |     |     |
| <i>rpl14</i>    | 82,230  | 82,598  | 369   | reverse |     |     |     |     |     |
| <i>rpl16</i>    | 82,737  | 84,120  | 1,384 | reverse | 399 | 976 | 9   |     |     |
| <i>rps3</i>     | 84,230  | 84,886  | 657   | reverse |     |     |     |     |     |
| <i>rpl22</i>    | 85,022  | 85,441  | 420   | reverse |     |     |     |     |     |
| <i>rps19</i>    | 85,534  | 85,812  | 279   | reverse |     |     |     |     |     |
| <i>rpl2</i>     | 85,880  | 87,385  | 1,506 | reverse | 434 | 681 | 391 |     |     |
| <i>rpl23</i>    | 87,404  | 87,685  | 282   | reverse |     |     |     |     |     |
| <i>trnI-CAU</i> | 87,851  | 87,924  | 74    | reverse |     |     |     |     |     |
| <i>ycf2</i>     | 88,013  | 94,852  | 6,840 | forward |     |     |     |     |     |
| <i>trnL-CAA</i> | 95,807  | 95,887  | 81    | reverse |     |     |     |     |     |
| <i>ndhB</i>     | 96,388  | 98,596  | 2,209 | reverse | 756 | 676 | 777 |     |     |
| <i>rps7</i>     | 98,910  | 99,377  | 468   | reverse |     |     |     |     |     |
| <i>trnV-GAC</i> | 101,966 | 102,037 | 72    | forward |     |     |     |     |     |
| <i>rrn16</i>    | 102,265 | 103,755 | 1,491 | forward |     |     |     |     |     |
| <i>trnI-GAU</i> | 104,053 | 105,078 | 1,026 | forward | 42  | 949 | 35  |     |     |
| <i>trnA-UGC</i> | 105,143 | 106,027 | 885   | forward | 38  | 812 | 35  |     |     |
| <i>rrn23</i>    | 106,191 | 108,998 | 2,808 | forward |     |     |     |     |     |
| <i>rrn4.5</i>   | 109,097 | 109,199 | 103   | forward |     |     |     |     |     |
| <i>rrn5</i>     | 109,448 | 109,568 | 121   | forward |     |     |     |     |     |
| <i>trnR-ACG</i> | 109,825 | 109,898 | 74    | forward |     |     |     |     |     |
| <i>trnN-GUU</i> | 110,365 | 110,436 | 72    | reverse |     |     |     |     |     |
| <i>ndhF</i>     | 111,901 | 114,144 | 2,244 | reverse |     |     |     |     |     |
| <i>rpl32</i>    | 115,272 | 115,430 | 159   | forward |     |     |     |     |     |
| <i>trnL-UAG</i> | 116,194 | 116,273 | 80    | forward |     |     |     |     |     |

|                 |         |         |       |         |     |       |     |
|-----------------|---------|---------|-------|---------|-----|-------|-----|
| <i>ccsA</i>     | 116,368 | 117,333 | 966   | forward |     |       |     |
| <i>ndhD</i>     | 117,587 | 119,089 | 1,503 | reverse |     |       |     |
| <i>psaC</i>     | 119,214 | 119,459 | 246   | reverse |     |       |     |
| <i>ndhE</i>     | 119,702 | 120,007 | 306   | reverse |     |       |     |
| <i>ndhG</i>     | 120,247 | 120,777 | 531   | reverse |     |       |     |
| <i>ndhI</i>     | 121,167 | 121,670 | 504   | reverse |     |       |     |
| <i>ndhA</i>     | 121,754 | 124,062 | 2,309 | reverse | 540 | 1,217 | 552 |
| <i>ndhH</i>     | 124,064 | 125,245 | 1,182 | reverse |     |       |     |
| <i>rps15</i>    | 125,349 | 125,621 | 273   | reverse |     |       |     |
| <i>ycf1</i>     | 126,011 | 131,737 | 5,727 | reverse |     |       |     |
| <i>trnN-GUU</i> | 132,065 | 132,136 | 72    | forward |     |       |     |
| <i>trnR-ACG</i> | 132,603 | 132,676 | 74    | reverse |     |       |     |
| <i>rrn5</i>     | 132,933 | 133,053 | 121   | reverse |     |       |     |
| <i>rrn4.5</i>   | 133,302 | 133,404 | 103   | reverse |     |       |     |
| <i>rrn23</i>    | 133,503 | 136,310 | 2,808 | reverse |     |       |     |
| <i>trnA-UGC</i> | 136,474 | 137,358 | 885   | reverse | 35  | 812   | 38  |
| <i>trnI-GAU</i> | 137,423 | 138,448 | 1,026 | reverse | 35  | 949   | 42  |
| <i>rrn16</i>    | 138,746 | 140,236 | 1,491 | reverse |     |       |     |
| <i>trnV-GAC</i> | 140,464 | 140,535 | 72    | reverse |     |       |     |
| <i>rps7</i>     | 143,124 | 143,591 | 468   | forward |     |       |     |
| <i>ndhB</i>     | 143,905 | 146,113 | 2,209 | forward | 776 | 676   | 757 |
| <i>trnL-CAA</i> | 146,614 | 146,694 | 81    | forward |     |       |     |
| <i>ycf2</i>     | 147,649 | 154,488 | 6,840 | reverse |     |       |     |
| <i>trnI-CAU</i> | 154,577 | 154,650 | 74    | forward |     |       |     |
| <i>rpl23</i>    | 154,816 | 155,097 | 282   | forward |     |       |     |
| <i>rpl2</i>     | <1      | >156590 | 1506  | forward | 391 | 681   | 404 |

\* The *rps12* gene is a trans-spliced gene with the 50 end located in the LSC region and the duplicated 30 ends in the IR region.

Table S2 Size comparison of complete cp genomes of four rose species

| Species                                     | LSC   | IRB   | SSC   | IRA   | Total  |
|---------------------------------------------|-------|-------|-------|-------|--------|
| <i>Rosa chinensis</i> var. <i>spontanea</i> | 85910 | 25959 | 18762 | 25959 | 156590 |
| <i>Rosa odorata</i> var. <i>gigantea</i>    | 85767 | 26053 | 18761 | 26053 | 156634 |
| <i>Rosa roxburghii</i>                      | 85852 | 26053 | 18791 | 26053 | 156749 |
| <i>Rosa praelucens</i>                      | 86313 | 26054 | 18765 | 26054 | 157186 |
